# Supplementary material for: Highly efficient biosynthesis of 2,4-dihydroxybutyric acid by a methanol assimilation pathway in engineered Escherichia coli
Source: Royal Society of Chemistry journal article supplement (doi:10.1039/d3gc02083e), 2023-01-01
Supplement: d3gc02083e1.pdf [file d3gc02083e1.pdf]

## Highly efficient biosynthesis of 2,4-dihydroxybutyric acid by a methanol assimilation pathway in engineered *Escherichia coli*

Xianjuan Dong,<sup>‡a</sup> Chao Sun,<sup>‡a,b,c</sup> Jing Guo,<sup>a,b,c</sup> Xiangyu Ma,<sup>a,d</sup> Mo Xian<sup>\*a,b,c</sup> and Rubing Zhang<sup>\*a,b,c</sup>

<sup>a</sup> CAS Key Laboratory of Bio-Based Materials, Qingdao Institute of Bioenergy and Bioprocess Technology, Chinese Academy of Sciences, Qingdao 266101, China

<sup>b</sup> Shandong Energy Institute, Qingdao 266101, China

<sup>c</sup> Qingdao New Energy Shandong Laboratory, Qingdao 266101, China

<sup>d</sup> University of Chinese Academy of Sciences, Beijing 100049, China

<sup>‡</sup>These authors contributed equally to this work.

\* Correspondence:

Rubing Zhang

Mailing address: Qingdao Institute of Bioenergy and Bioprocess Technology, Chinese Academy of Sciences, Qingdao 266101, China

Email: zhangrb@qibebt.ac.cn

Mo Xian

Mailing address: Qingdao Institute of Bioenergy and Bioprocess Technology, Chinese Academy of Sciences, Qingdao 266101, China

Email: xianmo@qibebt.ac.cn

### **<sup>1</sup>H-NMR and <sup>13</sup>C-NMR analysis of the 2,4-DHB**

<sup>1</sup>H-NMR and <sup>13</sup>C-NMR spectra were recorded on Bruker NMR spectrometers (600 MHz, in D<sub>2</sub>O). <sup>1</sup>H-NMR and <sup>13</sup>C-NMR chemical shifts ( $\delta$ C) are quoted in parts per million (ppm) downfield from trimethyl silane (TMS), and coupling constants (*J*) are quoted in Hertz (*Hz*).

### **LC-MS analysis of the 2,4-DHB**

The cell and supernatant were separated by centrifugation at 13,000 rpm for 30 min, and 1  $\mu$ L aliquot of the supernatant was injected into an LC-MS system. The HPLC was equipped with a Thermo Aclaim Organic Acid HPLC column (4 mm x 250 mm, 5  $\mu$ m) and eluted with a flow rate of 0.2 mL/min. The mobile phase A consisted of 0.1% of formic acid in water, and the mobile phase B was acetonitrile. The gradient elution was performed as described below: 0-4 min, 0%B; 4-10 min, 30%B; 10-12 min, 80%B; 12-17 min, 80%; 17-25 min, 0%B. A Compact Q-TOF mass spectrometry (Bruker Daltonics, Billerica, USA) with an ESI source in negative ion mode was used for MS analysis.

### **GC-MS analysis of the $\alpha$ -hydroxy- $\gamma$ -butyrolactone**

The aqueous solution of 2,4-DHB was adjusted to pH 2-12 with 10 M potassium hydroxide and hydrochloric acid, respectively. And the percentages of 2,4-DHB and  $\alpha$ -hydroxy- $\gamma$ -butyrolactone were detected using GC-MS. The  $\alpha$ -hydroxy- $\gamma$ -butyrolactone was assayed as follows: An equal amount of ethyl acetate was added to the aqueous solution after pH adjustment, vortexed briefly for 2 min, and centrifuged to separate the phases. 1  $\mu$ L was injected with using a split ratio 40:1 on an SH-Rtx-5MS Cap. Column (30 m, 0.25 mm ID, 0.25  $\mu$ m) using helium as the carrier gas. The inlet temperature and flow rate were set at 280  $^{\circ}$ C and 3.0 mL/min, respectively. The oven temperature gradient program was set as follows: initially held at 70  $^{\circ}$ C for 2 min, raised by 10  $^{\circ}$ C/min to 250  $^{\circ}$ C, hold for 5 min. The total run time was 25 min. The MS conditions for identification of  $\alpha$ -hydroxy- $\gamma$ -butyrolactone was as follows: for Q1 scan mode, 30-500 *m/z* mass-range. Quantification was based on the peak area ratios of the different compounds to standard chemicals.

Table S1 Strains and plasmids used in this study.

| Strain and plasmid          | Descriptions                                                                                                                          | Sources          |
|-----------------------------|---------------------------------------------------------------------------------------------------------------------------------------|------------------|
| Strains                     |                                                                                                                                       |                  |
| <i>E. coli</i> DH5 $\alpha$ | strain used for general cloning                                                                                                       | Laboratory stock |
| <i>E. coli</i> BL21(DE3)    | Strain used for constructing engineering bacteria and protein expression                                                              | Laboratory stock |
| <i>E. coli</i> W3110        | Strain used for constructing engineering bacteria and protein expression                                                              | Laboratory stock |
| JW0855                      | <i>E. coli</i> K-12 <i>poxB::kan</i>                                                                                                  | Keio collection  |
| JW0886                      | <i>E. coli</i> K-12 <i>pflB::kan</i>                                                                                                  | Keio collection  |
| JW1228                      | <i>E. coli</i> K-12 <i>adhE::kan</i>                                                                                                  | Keio collection  |
| JW2294                      | <i>E. coli</i> K-12 <i>pta::kan</i>                                                                                                   | Keio collection  |
| D1                          | <i>E. coli</i> W3110 <i>poxB::kan</i>                                                                                                 | This study       |
| D2                          | <i>E. coli</i> W3110 $\Delta$ <i>poxB</i>                                                                                             | This study       |
| D3                          | <i>E. coli</i> W3110 $\Delta$ <i>poxBpflB::kan</i>                                                                                    | This study       |
| D4                          | <i>E. coli</i> W3110 $\Delta$ <i>poxBpflB</i>                                                                                         | This study       |
| D5                          | <i>E. coli</i> W3110 $\Delta$ <i>poxBpflBadhE::kan</i>                                                                                | This study       |
| D6                          | <i>E. coli</i> W3110 $\Delta$ <i>poxBpflBadhE</i>                                                                                     | This study       |
| JW0348                      | <i>E. coli</i> K-12 <i>frmR::kan</i>                                                                                                  | Keio collection  |
| JW0347                      | <i>E. coli</i> K-12 <i>frmA::kan</i>                                                                                                  | Keio collection  |
| JW0346                      | <i>E. coli</i> K-12 <i>frmB::kan</i>                                                                                                  | Keio collection  |
| D7                          | <i>E. coli</i> W3110 $\Delta$ <i>poxBpflBadhE</i> $\Delta$ <i>frmRAB::kan</i>                                                         | This study       |
| D8                          | <i>E. coli</i> W3110 $\Delta$ <i>poxBpflBadhE</i> $\Delta$ <i>frmRAB</i>                                                              | This study       |
| DHB1                        | <i>E. coli</i> W3110 harboring pETDuet-lac- <i>khb-par</i>                                                                            | This study       |
| DHB2                        | <i>E. coli</i> W3110 harboring pETDuet-lac- <i>khb-pgcr</i>                                                                           | This study       |
| DHB3                        | <i>E. coli</i> W3110 harboring pETDuet-lac- <i>khb-cpar4</i>                                                                          | This study       |
| DHB4                        | <i>E. coli</i> W3110 harboring pETDuet-lac- <i>khb-ldh</i>                                                                            | This study       |
| DHB5                        | <i>E. coli</i> W3110 harboring pETDuet-lac- <i>khb-2ldh</i>                                                                           | This study       |
| DHB6                        | <i>E. coli</i> W3110 harboring pETDuet-lac- <i>khb-mdh</i>                                                                            | This study       |
| DHB7                        | <i>E. coli</i> W3110 $\Delta$ <i>poxB</i> harboring pETDuet-lac- <i>khb-ldh</i>                                                       | This study       |
| DHB8                        | <i>E. coli</i> W3110 $\Delta$ <i>poxBpflB</i> harboring pETDuet-lac- <i>khb-ldh</i>                                                   | This study       |
| DHB9                        | <i>E. coli</i> W3110 $\Delta$ <i>poxBpflBadhE</i> harboring pETDuet-lac- <i>khb-ldh</i>                                               | This study       |
| DHB10                       | <i>E. coli</i> W3110 $\Delta$ <i>poxBpflBadhE</i> harboring pETDuet-lac- <i>mdh2<sub>Bm</sub>-khb-ldh</i>                             | This study       |
| DHB11                       | <i>E. coli</i> W3110 $\Delta$ <i>poxBpflBadhE</i> harboring pETDuet-lac- <i>mdh<sub>Cn</sub>-khb-ldh</i>                              | This study       |
| DHB12                       | <i>E. coli</i> W3110 $\Delta$ <i>poxBpflBadhE</i> harboring pETDuet-lac- <i>mdh<sub>Cn</sub>(G48F)-khb-ldh</i>                        | This study       |
| DHB13                       | <i>E. coli</i> W3110 $\Delta$ <i>poxBpflBadhE</i> $\Delta$ <i>frmRAB</i> harboring pETDuet-lac- <i>mdh<sub>Cn</sub>(G48F)-khb-ldh</i> | This study       |

|                                                         |                                                                                                                                 |                  |
|---------------------------------------------------------|---------------------------------------------------------------------------------------------------------------------------------|------------------|
| DHB14                                                   | <i>E. coli</i> BL21(DE3) harboring pET28a (+)- <i>mdh</i> <sub>2Bm</sub> from <i>B. methanolicus</i> MGA3                       | This study       |
| DHB15                                                   | <i>E. coli</i> BL21(DE3) harboring pET28a (+)- <i>mdh</i> <sub>Cn</sub> from <i>Cupriavidus necator</i>                         | This study       |
| DHB16                                                   | <i>E. coli</i> BL21(DE3) harboring pET28a (+)- <i>mdh</i> <sub>Cn</sub> (G48F)                                                  | This study       |
| DHB17                                                   | <i>E. coli</i> BL21(DE3) harboring pET28a (+)- <i>mdh</i> <sub>Cn</sub> (M52F)                                                  | This study       |
| DHB18                                                   | <i>E. coli</i> BL21(DE3) harboring pET28a (+)- <i>mdh</i> <sub>Cn</sub> (C369N)                                                 | This study       |
| Plasmids                                                |                                                                                                                                 |                  |
| pCP20                                                   | Amp <sup>R</sup> Cm, FLP recombinase expression                                                                                 | Laboratory stock |
| pKD46                                                   | Amp <sup>R</sup> , λ Red recombinase expression                                                                                 | Laboratory stock |
| pETDuet-1                                               | <i>E. coli</i> expression vector, Amp <sup>R</sup> , T7 promoter                                                                | Laboratory stock |
| pETDuet-lac                                             | <i>E. coli</i> expression vector, Amp <sup>R</sup> , lac <sub>1-6</sub> promoter                                                | This study       |
| pETDuet-lac- <i>khb</i>                                 | pETDuet-lac, Amp <sup>R</sup> , <i>khb</i> expression, lac promoter                                                             | This study       |
| pETDuet-lac- <i>khb-par</i>                             | pETDuet-lac- <i>khb</i> , Amp <sup>R</sup> , <i>par</i> expression, lac promoter                                                | This study       |
| pETDuet-lac- <i>khb-pgcr</i>                            | pETDuet-lac- <i>khb</i> , Amp <sup>R</sup> , <i>pgcr</i> expression, lac promoter                                               | This study       |
| pETDuet-lac- <i>khb-cpar4</i>                           | pETDuet-lac- <i>khb</i> , Amp <sup>R</sup> , <i>cpar4</i> expression, lac promoter                                              | This study       |
| pETDuet-lac- <i>khb-ldh</i>                             | pETDuet-lac- <i>khb</i> , Amp <sup>R</sup> , <i>ldh</i> expression, lac promoter                                                | This study       |
| pETDuet-lac- <i>khb-2ldh</i>                            | pETDuet-lac- <i>khb</i> , Amp <sup>R</sup> , <i>2ldh</i> expression, lac promoter                                               | This study       |
| pETDuet-lac- <i>khb-mdh</i>                             | pETDuet-lac- <i>khb</i> , Amp <sup>R</sup> , <i>mdh</i> expression, lac promoter                                                | This study       |
| pETDuet-lac- <i>mdh</i> <sub>2Bm</sub> - <i>khb-ldh</i> | pETDuet-lac- <i>khb-ldh</i> , Amp <sup>R</sup> , <i>mdh</i> <sub>2Bm</sub> , <i>mdh</i> <sub>2Bm</sub> expression, lac promoter | This study       |
| pET28a(+)                                               | <i>E. coli</i> expression vector, Kan <sup>R</sup> , T7 promoter                                                                | This study       |
| pET28a- <i>mdh</i> <sub>2Bm</sub>                       | pET28a(+), Kan <sup>R</sup> , <i>mdh</i> <sub>2Bm</sub> expression, T7 promoter                                                 | This study       |
| pET28a- <i>mdh</i> <sub>Cn</sub>                        | pET28a(+), Kan <sup>R</sup> , <i>mdh</i> <sub>Cn</sub> expression, T7 promoter                                                  | This study       |
| pET28a- <i>mdh</i> <sub>Cn</sub> (G48F)                 | pET28a(+)- <i>mdh</i> <sub>Cn</sub> , Kan <sup>R</sup> , <i>mdh</i> <sub>Cn/G48F</sub> expression, T7 promoter                  | This study       |
| pET28a- <i>mdh</i> <sub>Cn</sub> (M52F)                 | pET28a(+)- <i>mdh</i> <sub>Cn</sub> , Kan <sup>R</sup> , <i>mdh</i> <sub>Cn/M52F</sub> expression, T7 promoter                  | This study       |
| pET28a- <i>mdh</i> <sub>Cn</sub> (C369N)                | pET28a(+)- <i>mdh</i> <sub>Cn</sub> , Kan <sup>R</sup> , <i>mdh</i> <sub>Cn/C369N</sub> expression, T7 promoter                 | This study       |
| pETDuet-lac- <i>mdh</i> <sub>Cn</sub> - <i>khb-ldh</i>  | pETDuet-lac- <i>khb-ldh</i> , Amp <sup>R</sup> , <i>mdh</i> <sub>Cn</sub> expression, lac promoter                              | This study       |

|                                                              |                                                                                                                                                |            |
|--------------------------------------------------------------|------------------------------------------------------------------------------------------------------------------------------------------------|------------|
| pETDuet-lac- <i>mdh<sub>Cn</sub></i> (G48F)- <i>khh-l dh</i> | pETDuet-lac- <i>mdh<sub>Cn</sub></i> - <i>khh-l dh</i> , Amp <sup>R</sup> , <i>mdh<sub>Cn</sub><sup>G48F</sup></i><br>expression, lac promoter | This study |
|--------------------------------------------------------------|------------------------------------------------------------------------------------------------------------------------------------------------|------------|

Table S2 List of PCR primers sequences used in this study.

| Primers                   | Descriptions (5'-3')                               | Sources    |
|---------------------------|----------------------------------------------------|------------|
| khh-F                     | taagaaggagatataccatgggcAAAACTGGAAAACAAGTGCA        | This study |
| khh-R                     | gccgagctcgaattcggatccTTACAGCTTAGCGCCTTCTACAGC      | This study |
| par-F                     | taagaaggagatatacatatgAAAGCGATTAGTATACCCG           | This study |
| par-R                     | gccgatatccaattgagatctTTAGCGCGGGGTGCAGCT            | This study |
| pgcr-F                    | taagaaggagatatacatatgAAAAGCATGATTAACGAAAACA        | This study |
| pgcr-R                    | gccgatatccaattgagatctTTACGCGCGCAATAGCC             | This study |
| cpar4-F                   | taagaaggagatatacatatgAGCGCGCAGCTGAAA               | This study |
| cpar4-R                   | gccgatatccaattgagatctTTAATCGTTAAAGTTGTTAAAGCCCG    | This study |
| ldh-F                     | taagaaggagatatacatatgGCAAGTATTACGGATAAGGATC        | This study |
| ldh-R                     | gccgatatccaattgagatctTTACTGACGAGTTTCGATGTCATTC     | This study |
| 2ldh-F                    | taagaaggagatatacatatgACAAAAATTCTAATGTATACCGTCCG    | This study |
| 2ldh-R                    | gccgatatccaattgagatctTTAGTTGACTTGATGCGCTGACTT      | This study |
| mdh-F                     | taagaaggagatatacatatgAAAGTCGCAGTCCTCGGCG           | This study |
| mdh-R                     | gccgatatccaattgagatctTTACTTATTAACGAACTCTTCGCCC     | This study |
| mdh2 <sub>Bm</sub> -F     | taagaaggagatataccatggGCAAAAACACCCAGTCTGCTTT        | This study |
| mdh2 <sub>Bm</sub> -R     | CCAGTTTTTCATggtatctccttTTACATAGCGTTTTT             | This study |
| mdh <sub>Cn</sub> -F      | taagaaggagatataccatggcACCCATCTGAACATTGCGAACC       | This study |
| mdh <sub>Cn</sub> -R      | CAGTTTTTCATggtatctccttTTACATCGCCG                  | This study |
| mdh2 <sub>Bm</sub> -BamHI | cagcaaatgggtcgcggatccATGAAGAATACTCAGTCAGCTTTCTACA  | This study |
| mdh2 <sub>Bm</sub> -SacI  | gcaagcttgctgacggagctcTCACATTGCATTCTTAATAATCTGAATAA | This study |
| mdh <sub>Cn</sub> -BamHI  | cagcaaatgggtcgcggatccATGACCCATCTGAACATTGCG         | This study |
| mdh <sub>Cn</sub> -SacI   | gcaagcttgctgacggagctcTTACATCGCCGCCGCAAA            | This study |
| G48F-F                    | CGATGCGtttTCGATAAAAATGGGCCTGAGCG                   | This study |
| G48F-R                    | TATGCAGaaaCGCATCGGTCACAATCAGAGCT                   | This study |
| M52F-F                    | CCTGCATAAAtttGGCCTGAGCGAAGTGGTGG                   | This study |
| M52F-R                    | GGCCaaaTTTATGCAGGCCCGCATCGGTCACA                   | This study |
| S265R-F                   | TTTAAACAACGCGgctGGGCTATGTGCATGCGA                  | This study |
| S265R-R                   | AGgctCGCGTTGTTAAACGCCATGCCCGCCAG                   | This study |
| C369N-F                   | AGATGCGGaacATGCTGACCAACCCGCGCAAAG                  | This study |
| C369N-R                   | TCAGCATgttCGCATCTTTCTGCGGTTGCTC                    | This study |
| pKD4-Km300-3'             | GGTGAGATGACAGGAGATCCT                              | This study |
| poxB-F                    | CCGAAATCGC TGAAGGTTAC                              | This study |
| pflB-F                    | CACCGGAAAA TTTTCTCAC                               | This study |
| adhE-F                    | CACCGGAAAA TTTTCTCAC                               | This study |
| pta-F                     | CATATGTTTT GTCAAAATGT                              | This study |
| FrmRAB-F                  | TGATCACCAGCTACCGCTATACC                            | This study |

Table S3 The specific activities of the Mdh<sub>2Bm</sub> and Mdh<sub>Cn</sub>.

| Enzyme             | Specific activity (U/mg) |
|--------------------|--------------------------|
| Mdh <sub>2Bm</sub> | 0.003                    |
| Mdh <sub>Cn</sub>  | 0.023                    |

Note: Data are presented as the mean (n=3).

Table S4 The specific activities of the Mdh<sub>Cn</sub> and its mutants.

| Mutation                | Specific activity (U/mg) |
|-------------------------|--------------------------|
| WT (Mdh <sub>Cn</sub> ) | 0.023                    |
| G48F                    | 0.074                    |
| M52F                    | 0.032                    |
| C369N                   | 0.046                    |

Note: Data are presented as the mean (n=3).

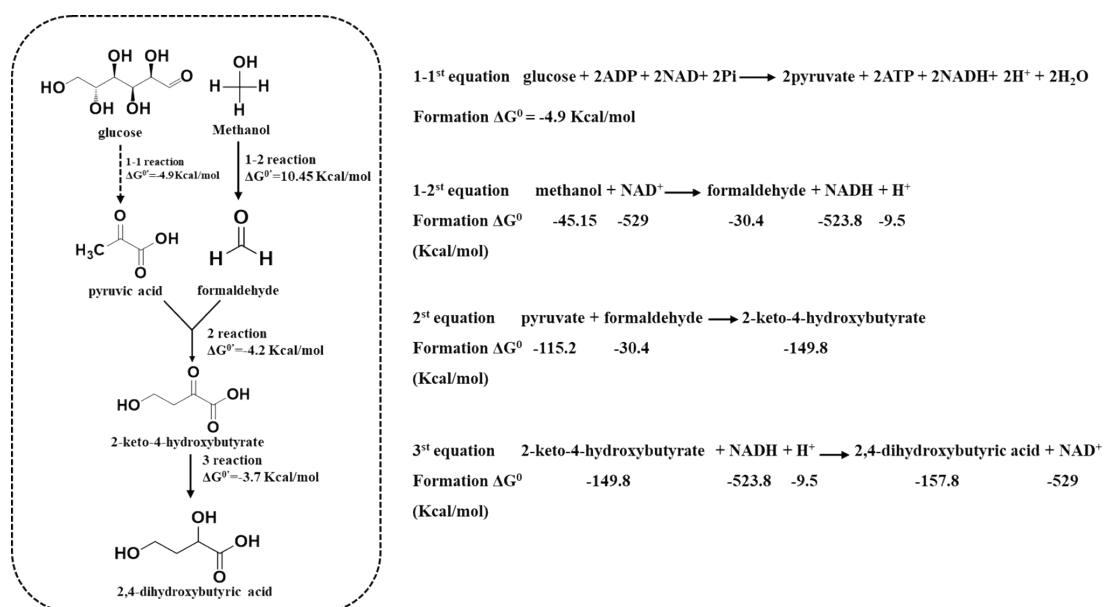

Fig. S1 Gibbs free energy of the synthetic pathway of 2,4-DHB using the glucose and methanol (or formaldehyde) as co-substrate.

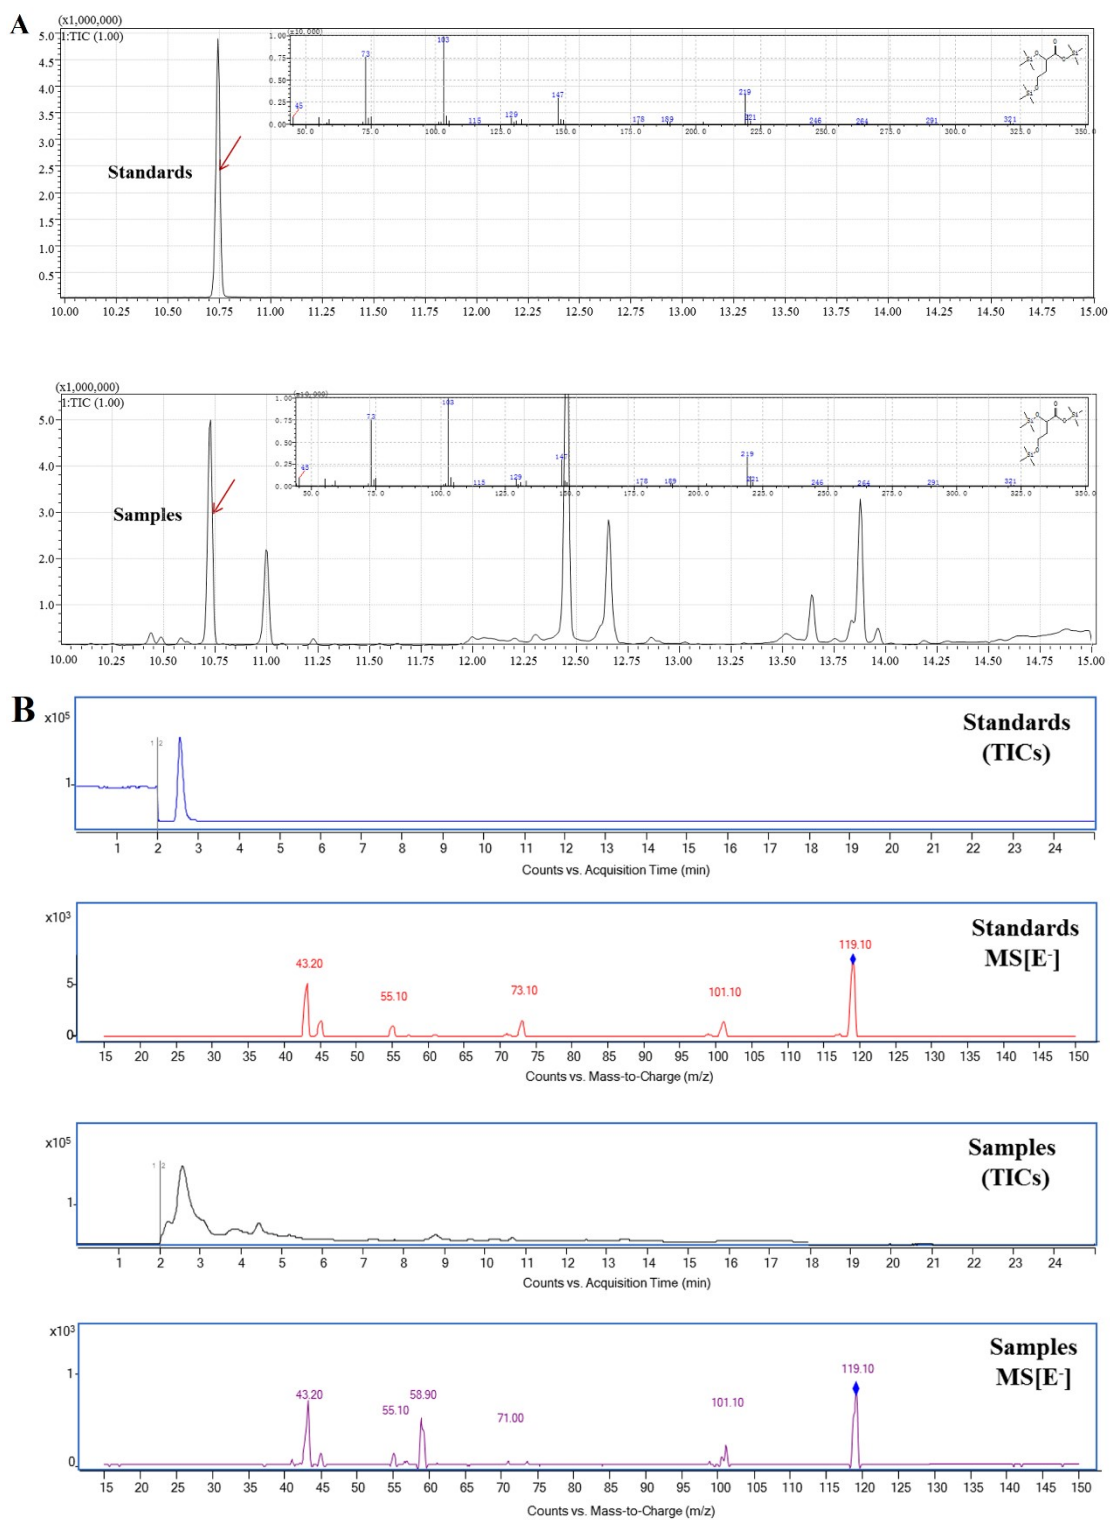

Fig. S2 Verification of 2,4-DHB synthesis from glucose and formaldehyde using GC-MS and LC-MS analysis. (A) GC-MS analysis of standard substance and sample. (B) The total ion chromatograms (TICs) and HRESI-MS (MS[E<sup>-</sup>]) spectrum of standard substance and sample.

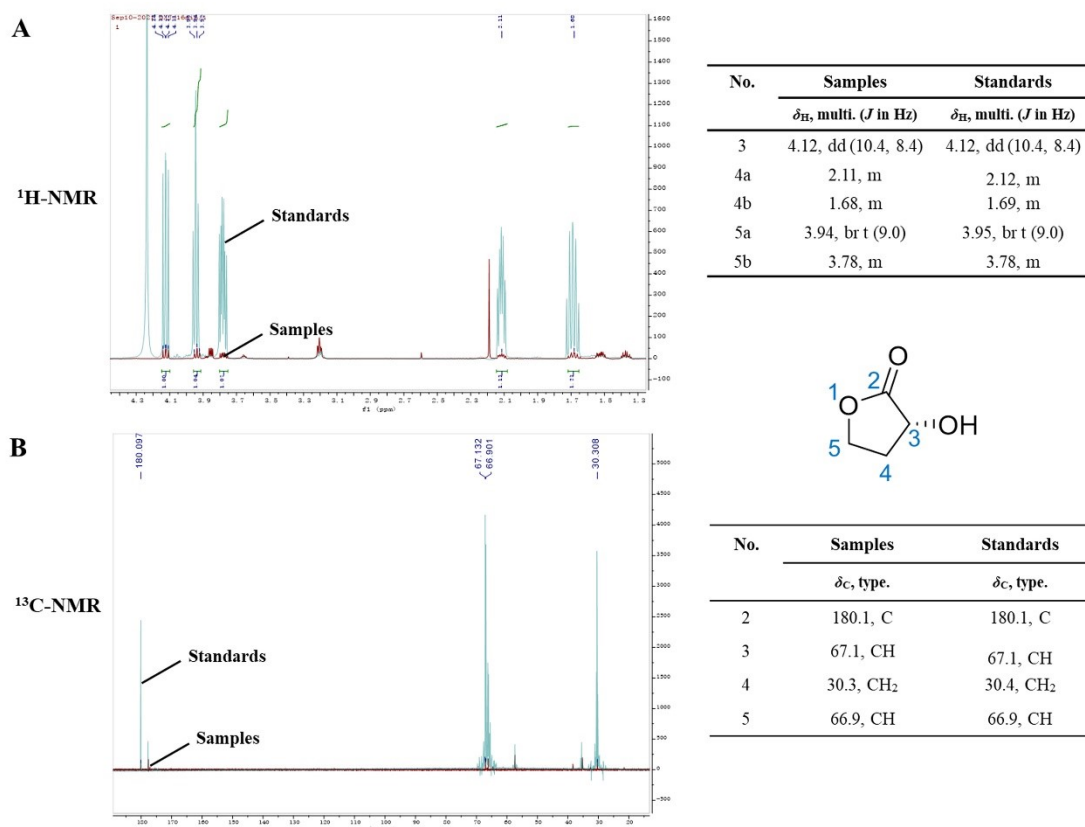

Fig. S3 Verification of 2,4-DHB synthesis from glucose and formaldehyde using NMR analysis. (A) <sup>1</sup>H NMR spectrum of 2,4-DHB standard substance and purified product; (B) <sup>13</sup>C NMR spectrum of 2,4-DHB standard substance and purified product.

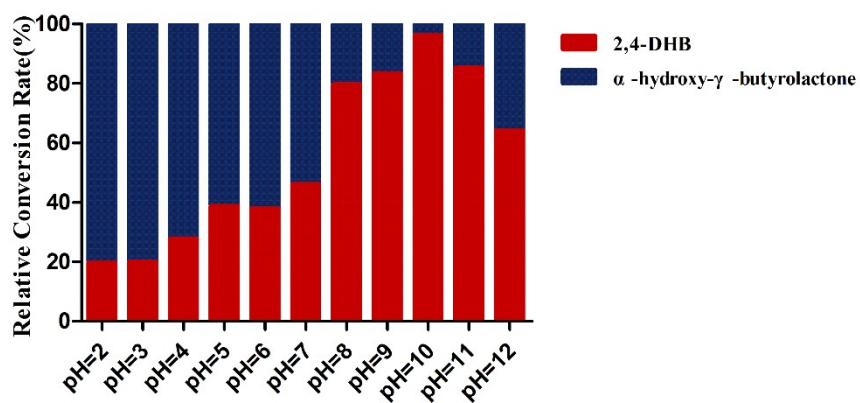

Fig. S4 Interconversion between 2,4-DHB and  $\alpha$ -hydroxy- $\gamma$ -butyrolactone under pH-neutral conditions.



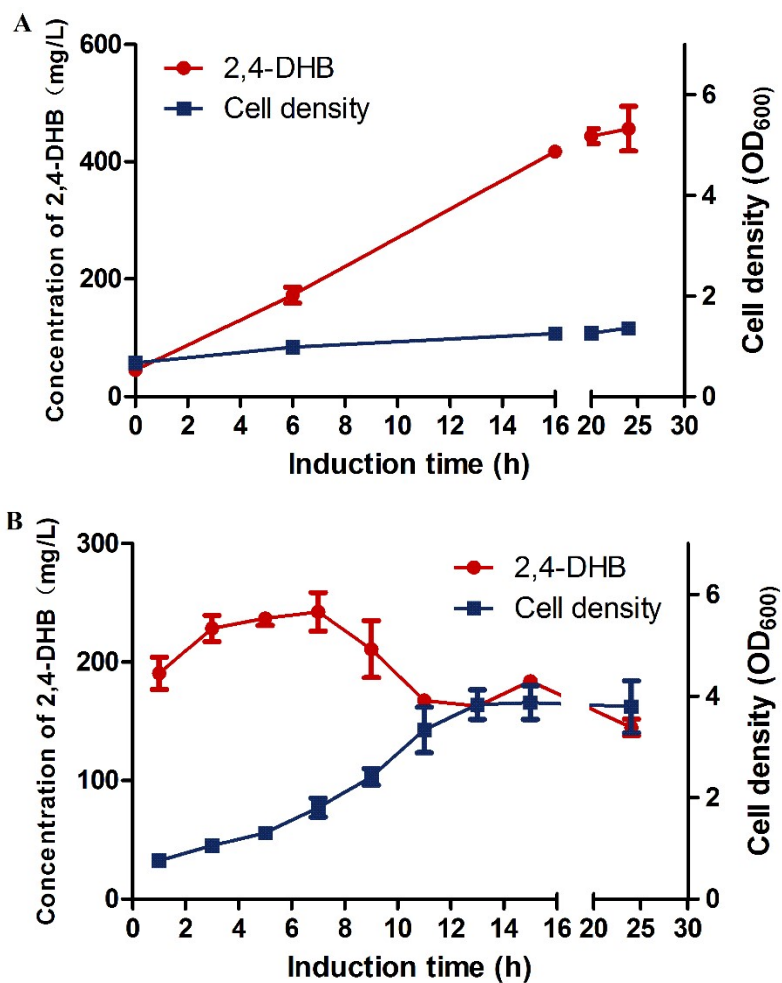

Fig. S5 Time profiles of 2,4-DHB biosynthesis with different substrates. (A) The production of 2,4-DHB from formaldehyde and glucose co-substrate. (B) The production of 2,4-DHB from methanol and glucose co-substrate.
